# Supplementary material for: GRK3 is a poor prognosticator and serves as a therapeutic target in advanced gastric adenocarcinoma
Source: Springer Nature journal article supplement (doi:10.1186/s13046-022-02463-6), 2022-08-23

Supplementary Figure 1.

**A**

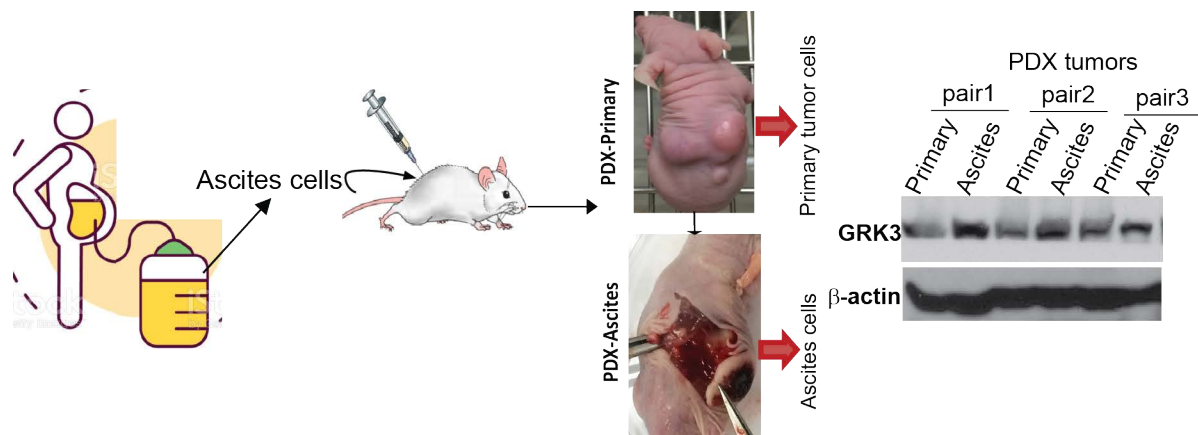

**B**

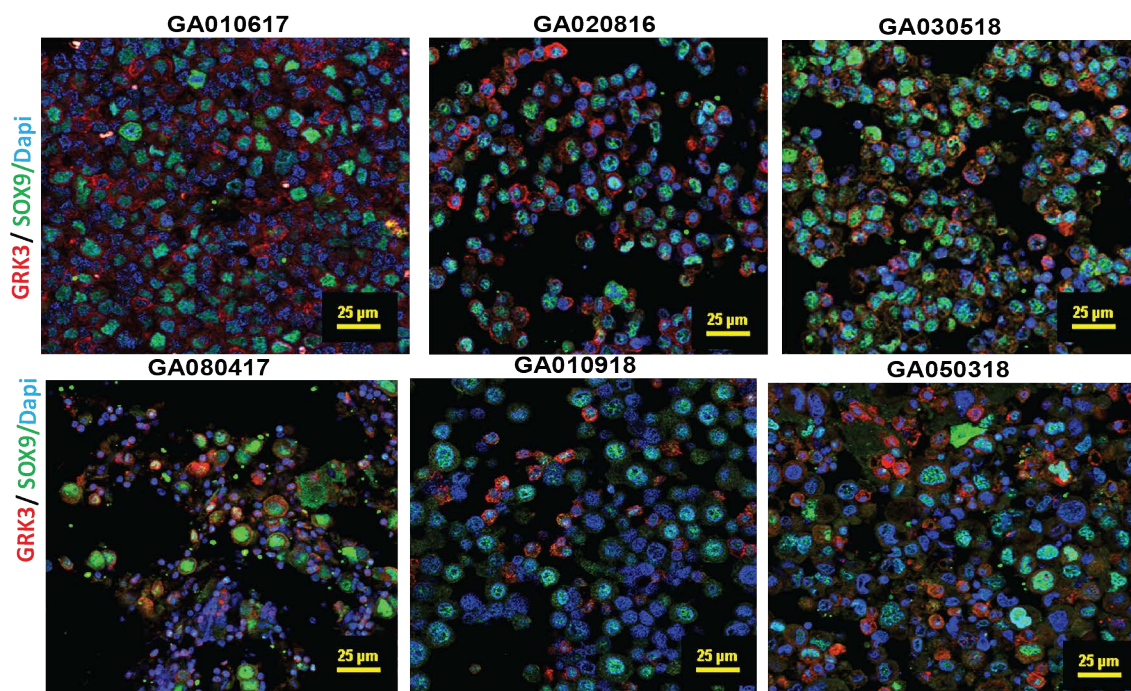

**C**

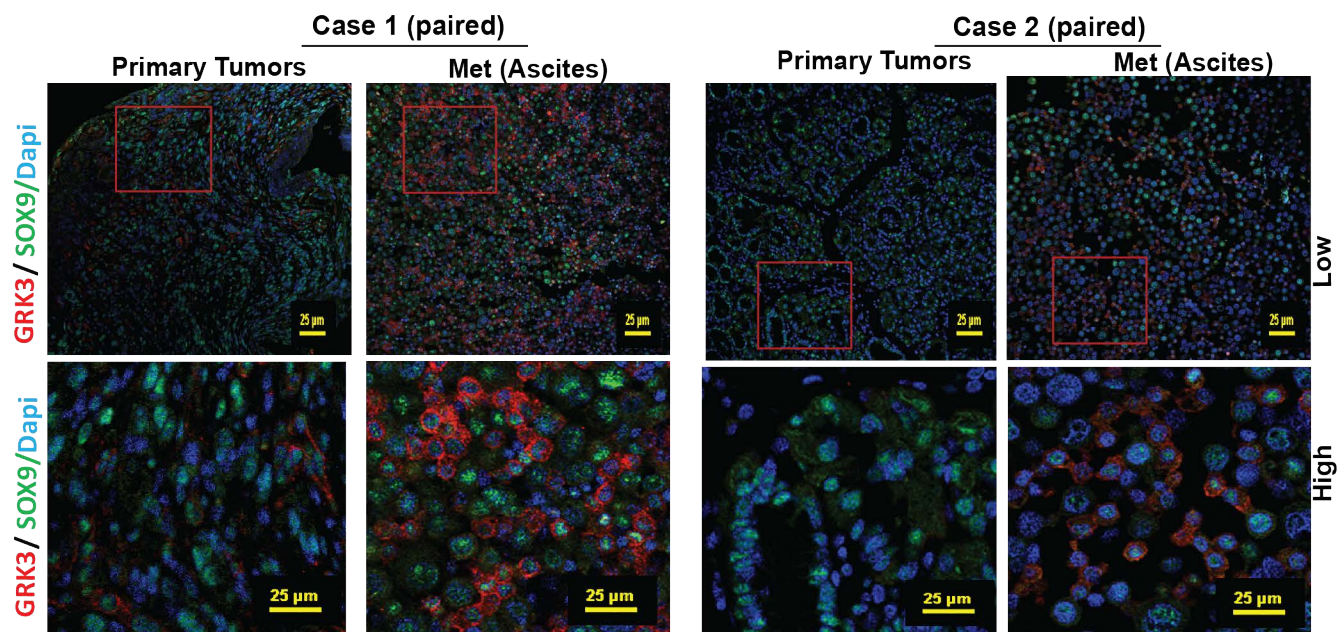

**Supplementary Figure 2.**

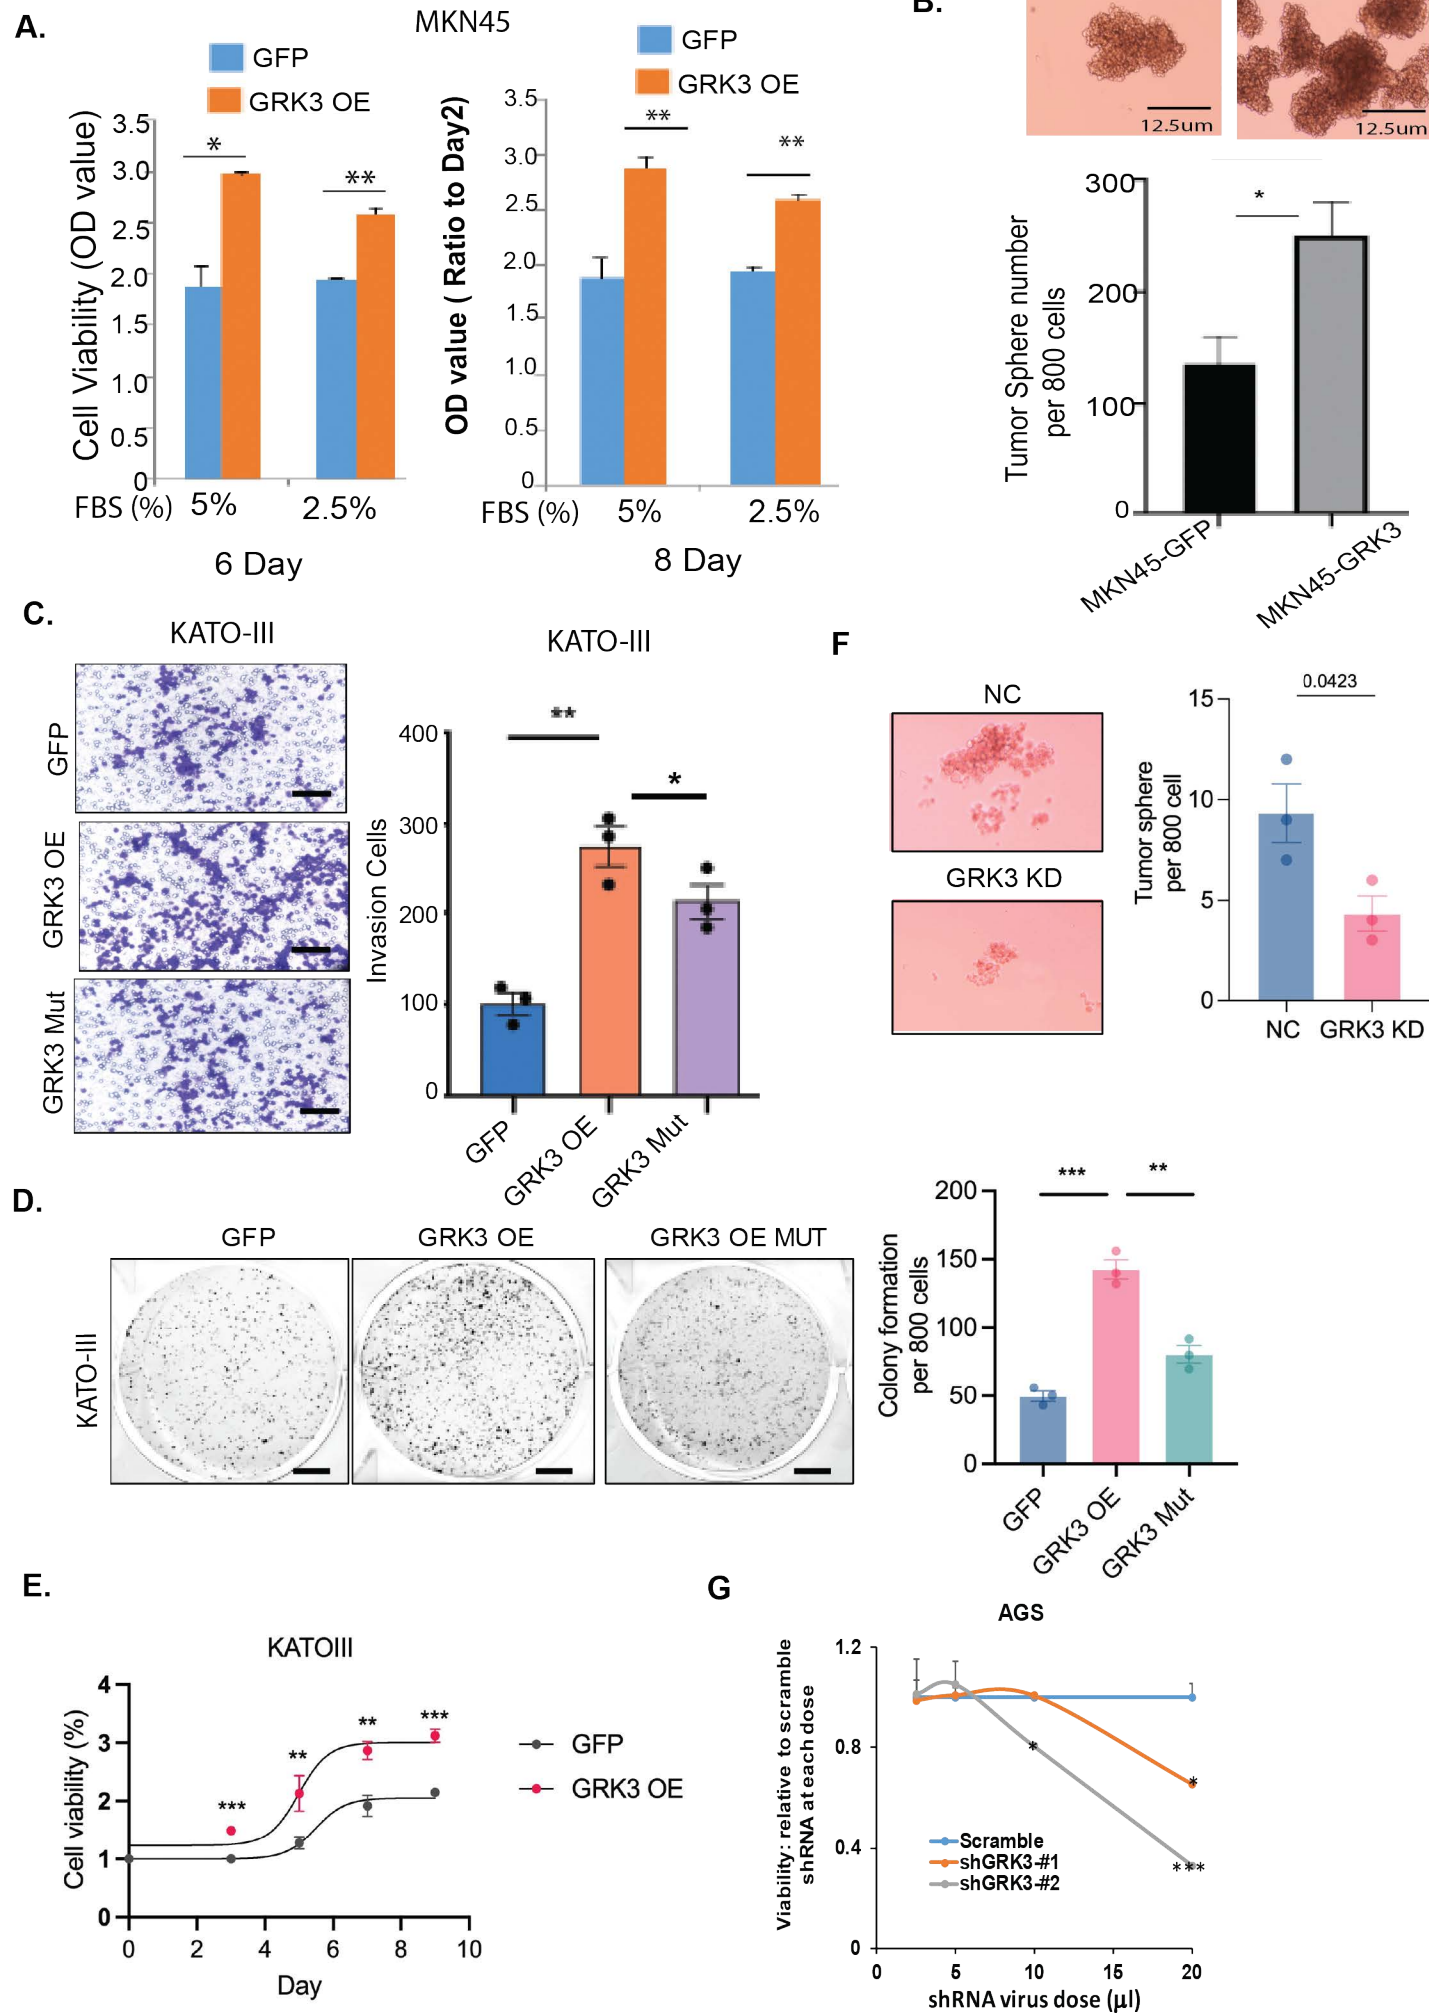

Supplementary Figure 3.

A.

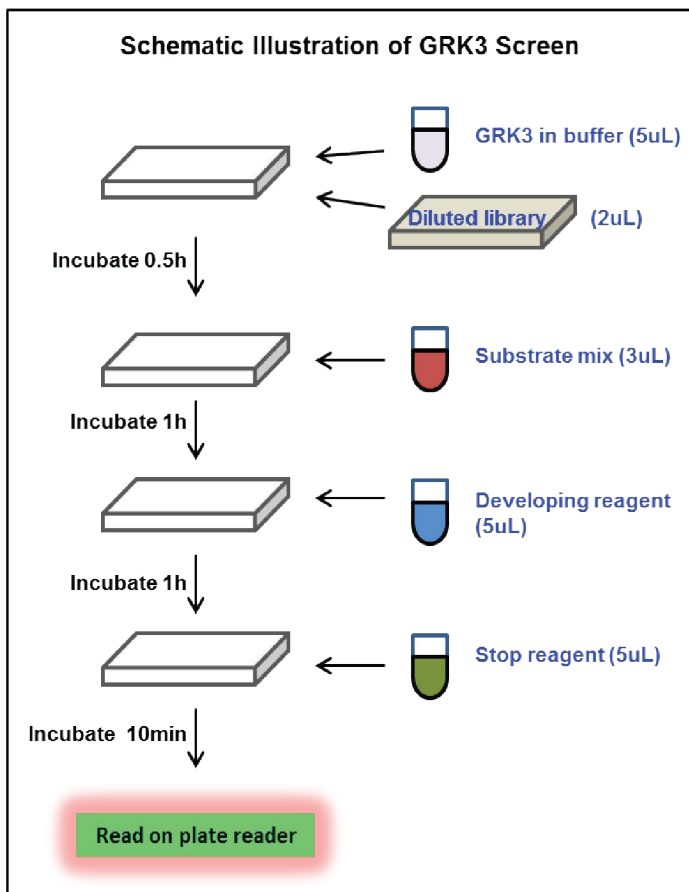

B.

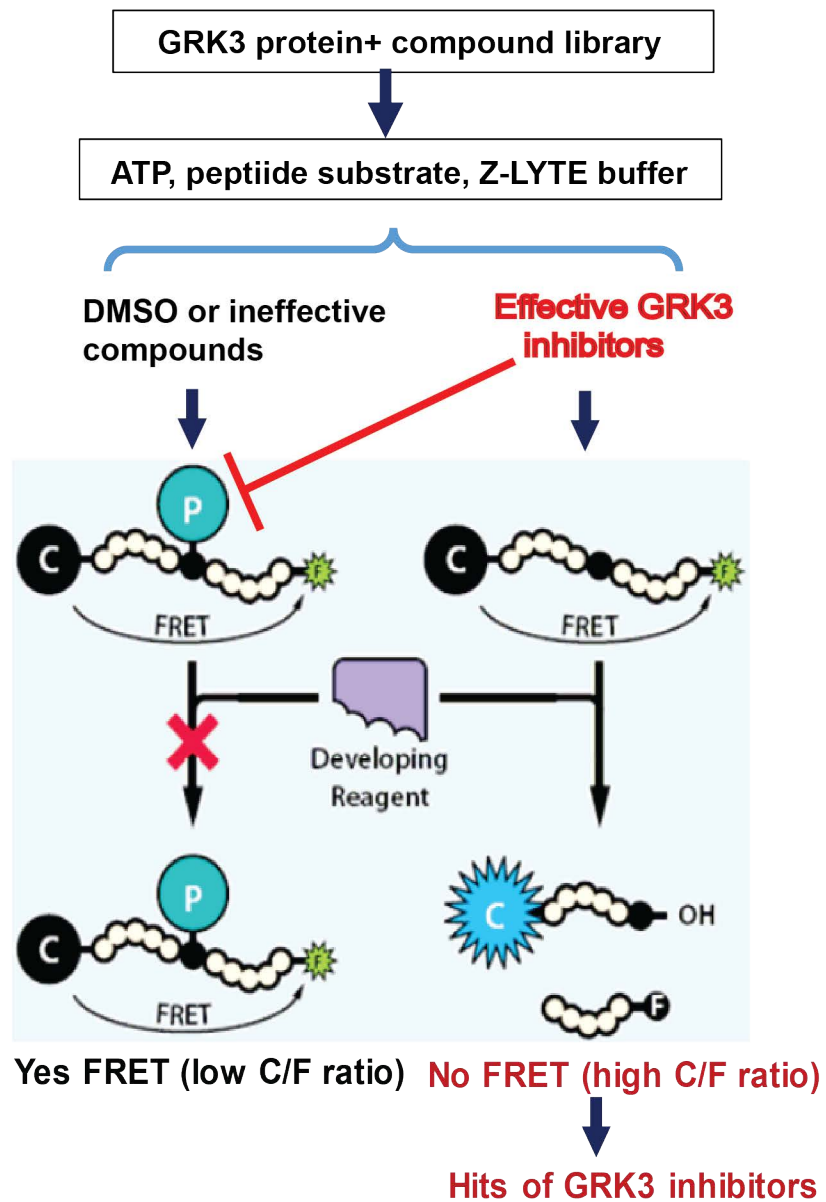

A.

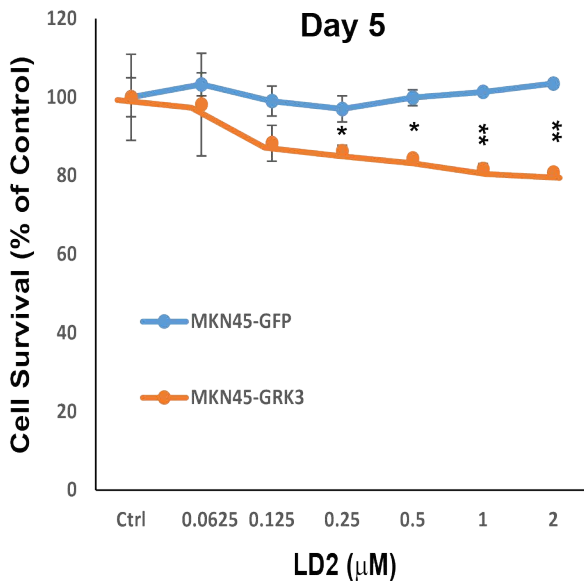

B.

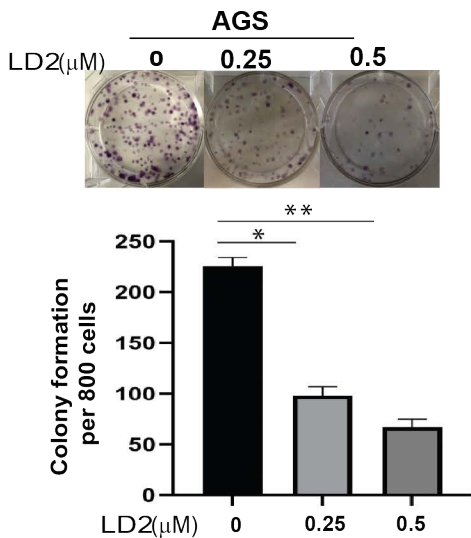

C.

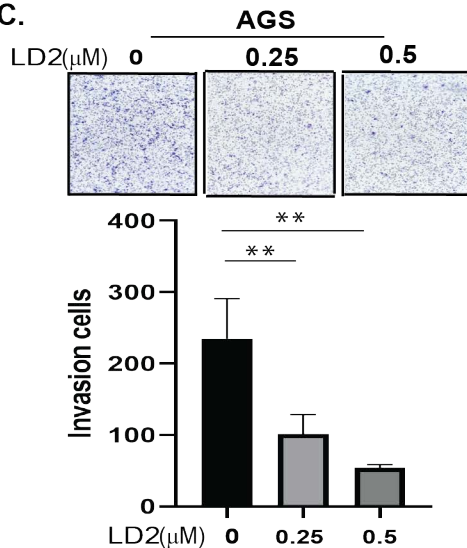

Supplementary Figure 5.

**A.**

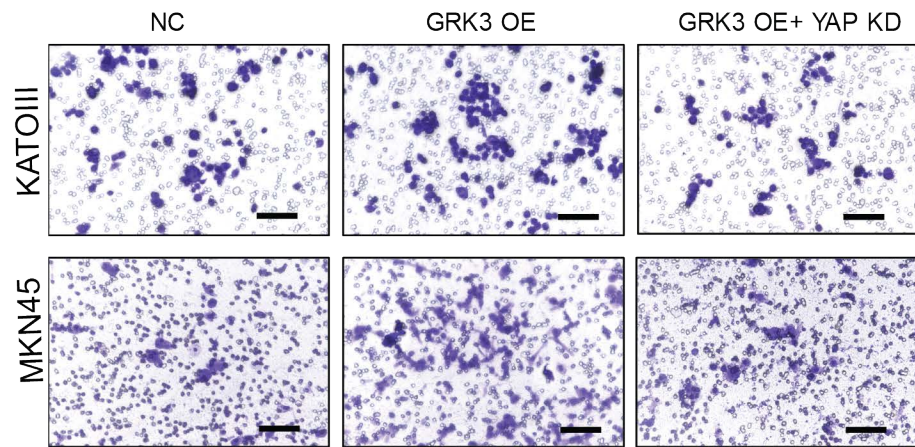

**B.**

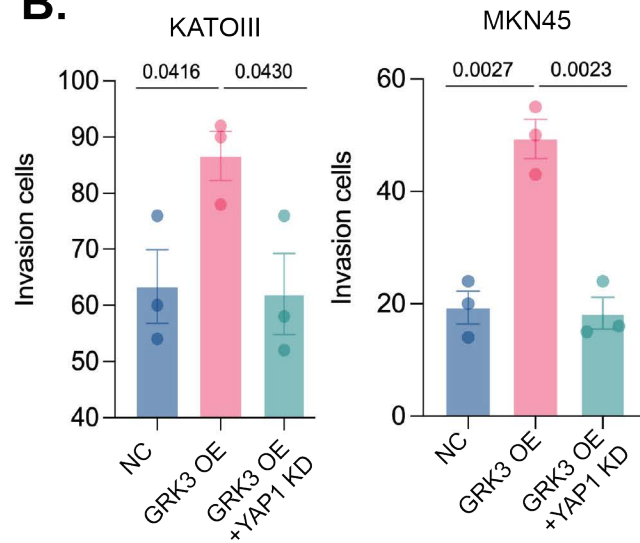

**C.**

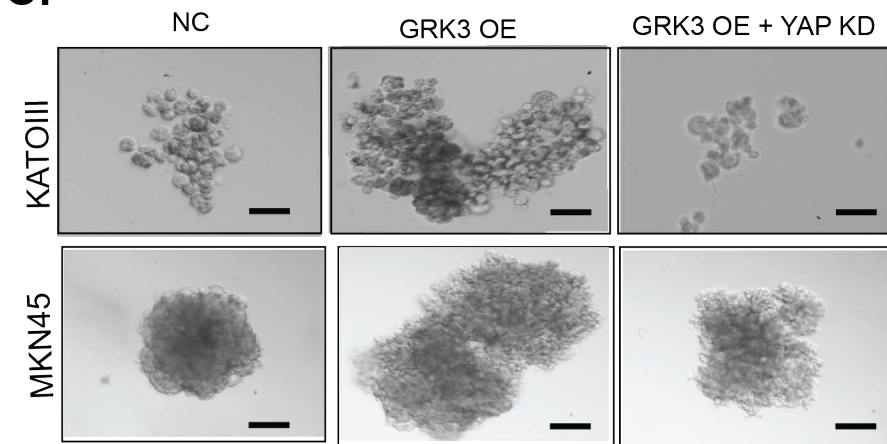

**D.**

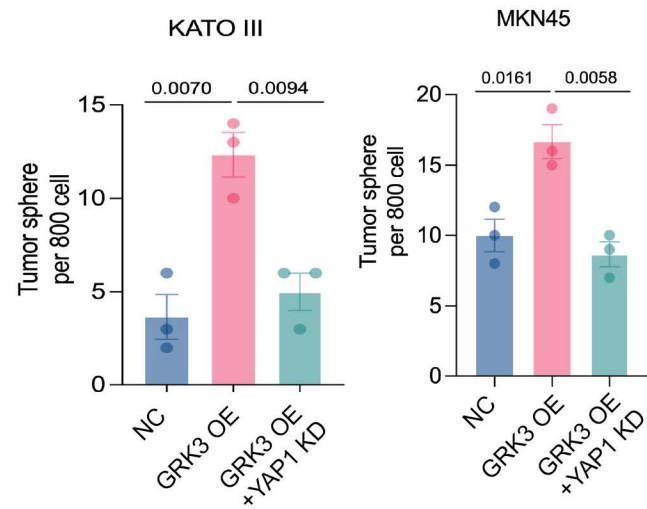

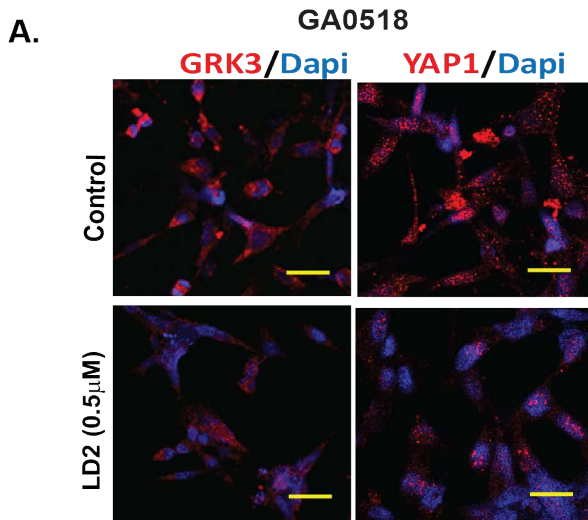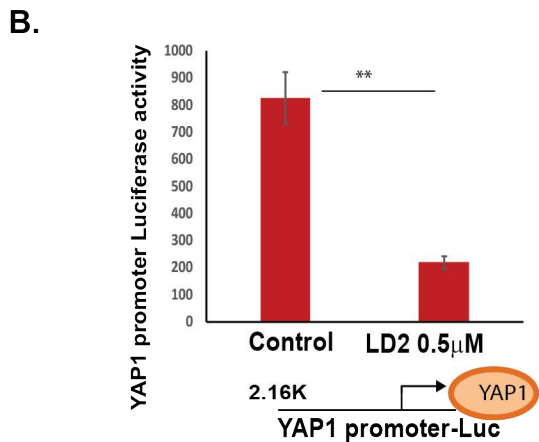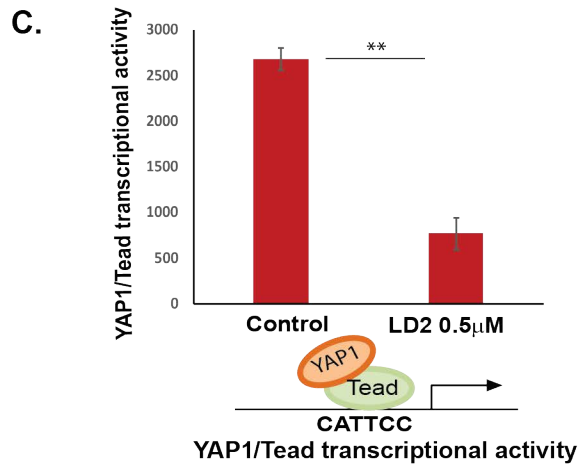

Supplementary Figure 7

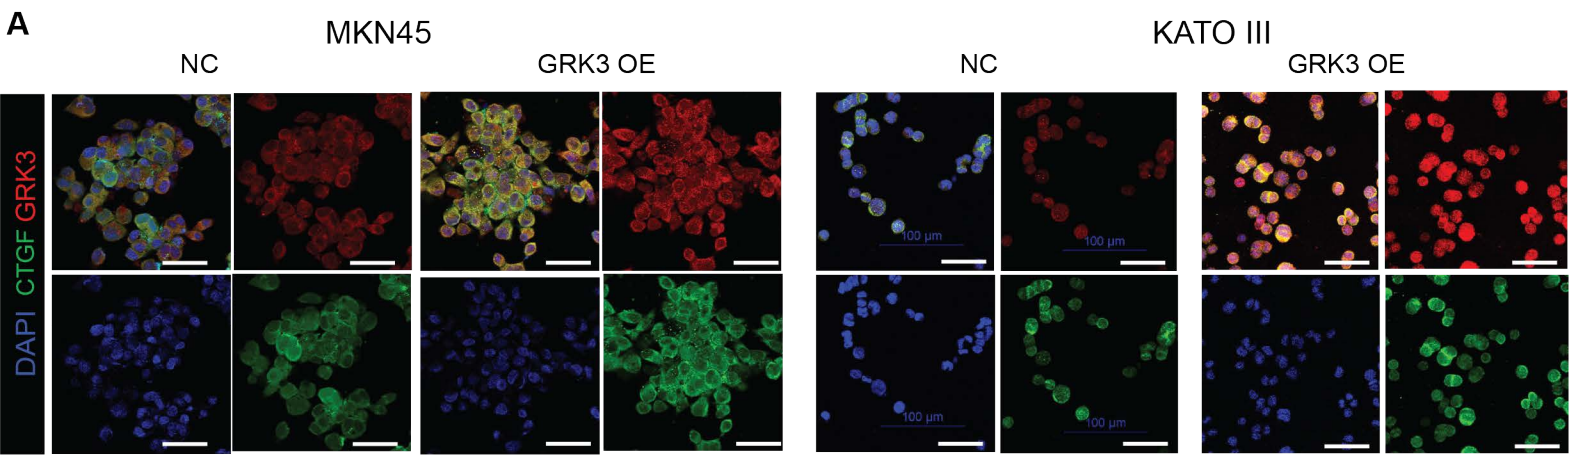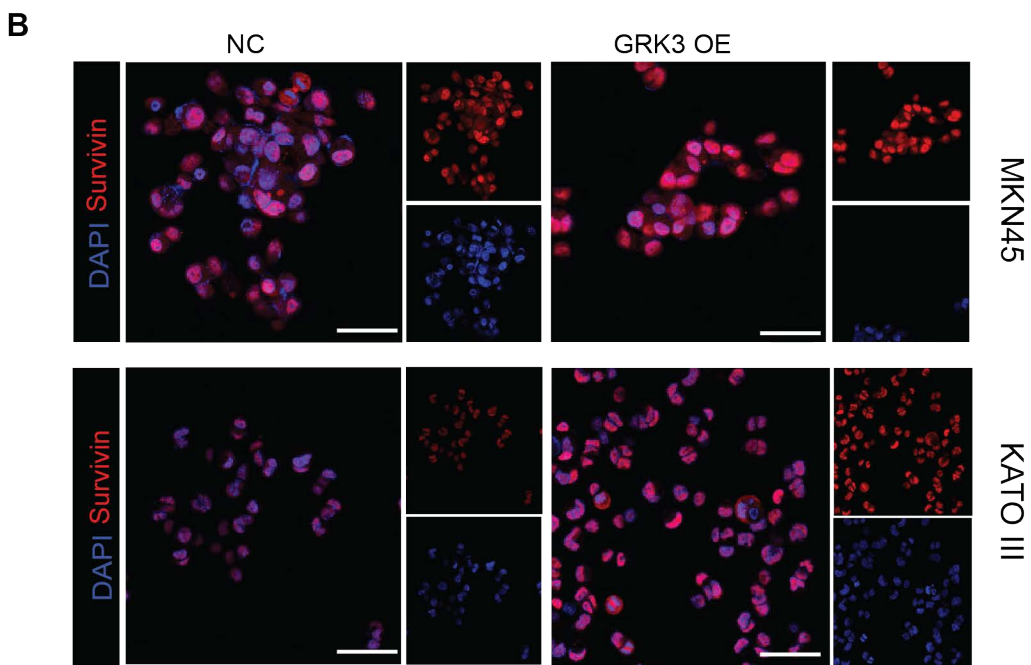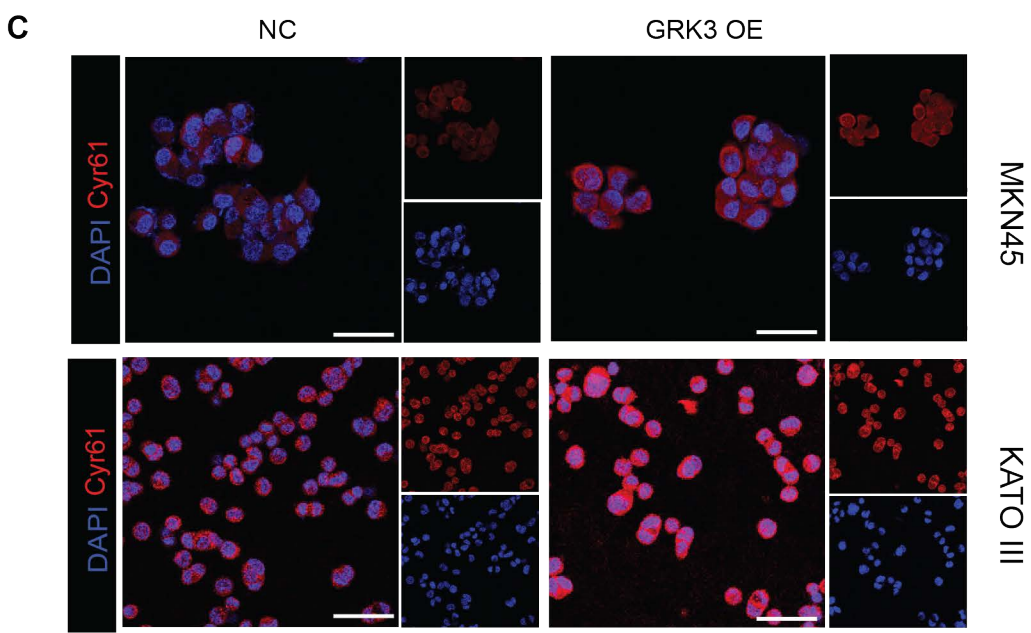

Supplementary Figure 8.

A.

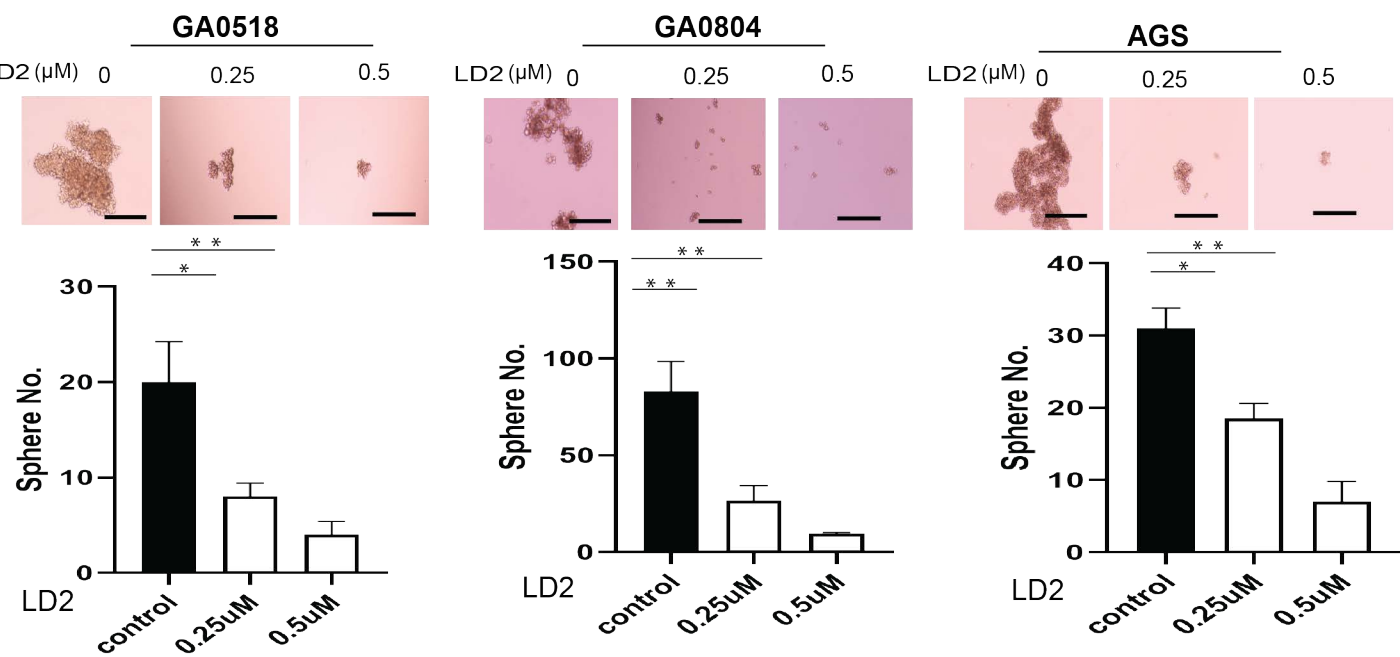

B.

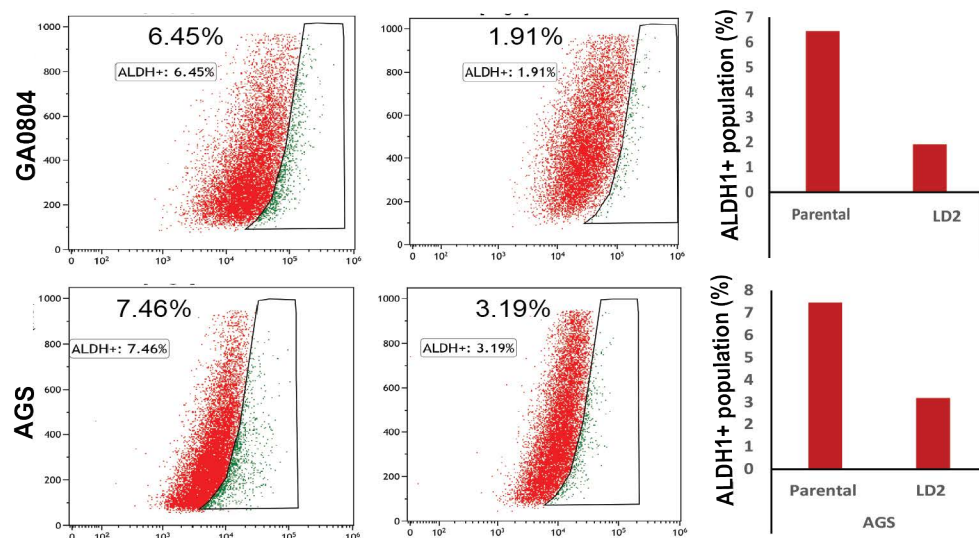



# Supplementary Figure 9.

**A.** NC GRK3 OE GRK3 OE+LD2

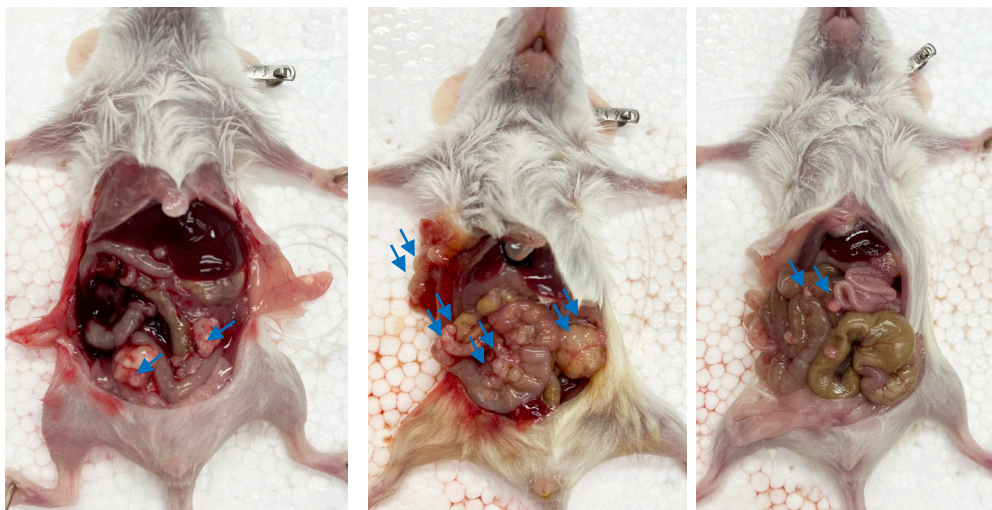

**B.**

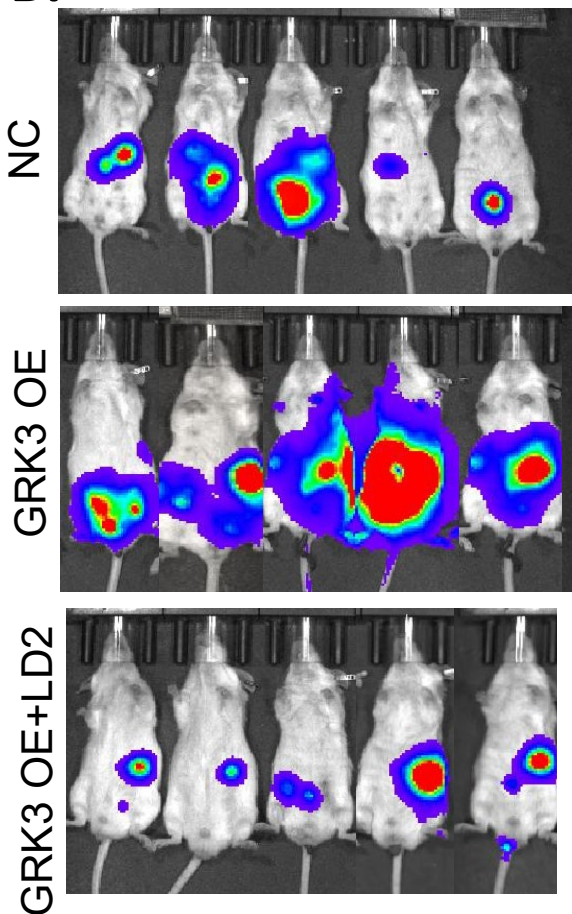

**C.**

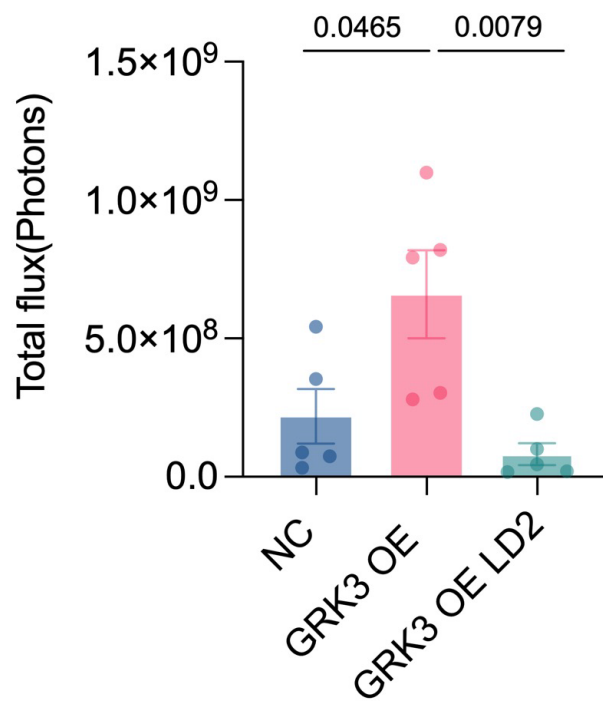

Supplement: MOESM2 [file 23393638]
